# Supplementary material for: Pterostilbene induces pyroptosis of breast cancer cells, inhibits the growth and invasion of transplanted tumor and reshapes its tumor microenvironment
Source: Research Square preprint supplement (doi:10.21203/rs.3.rs-2185352/v1), 2022-11-22
Supplement: Supplementary file 1 [file 788336555bedf88fcc7e81d7.docx]

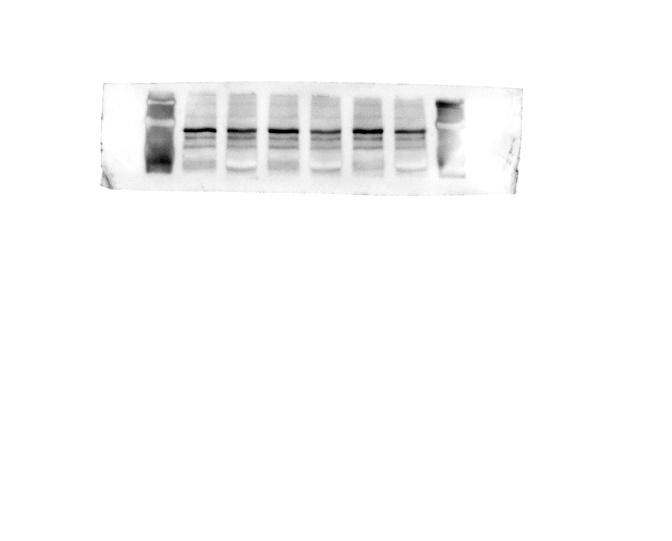


MMP2 - EMT6 (Fig.1 D)


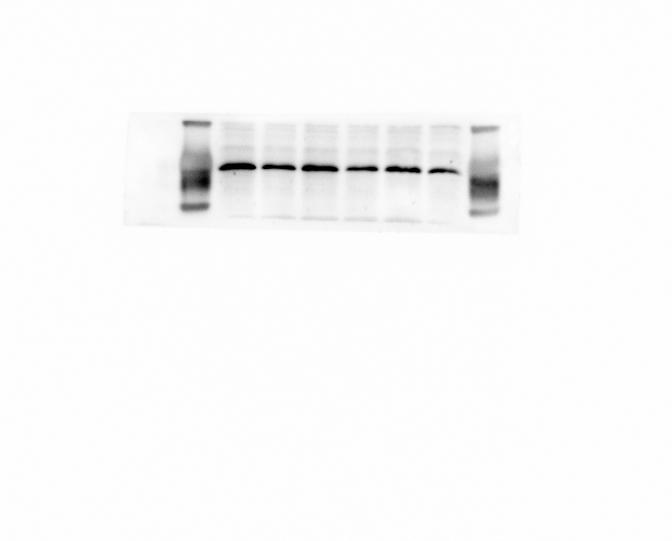


MMP9 - EMT6 (Fig.1 D)


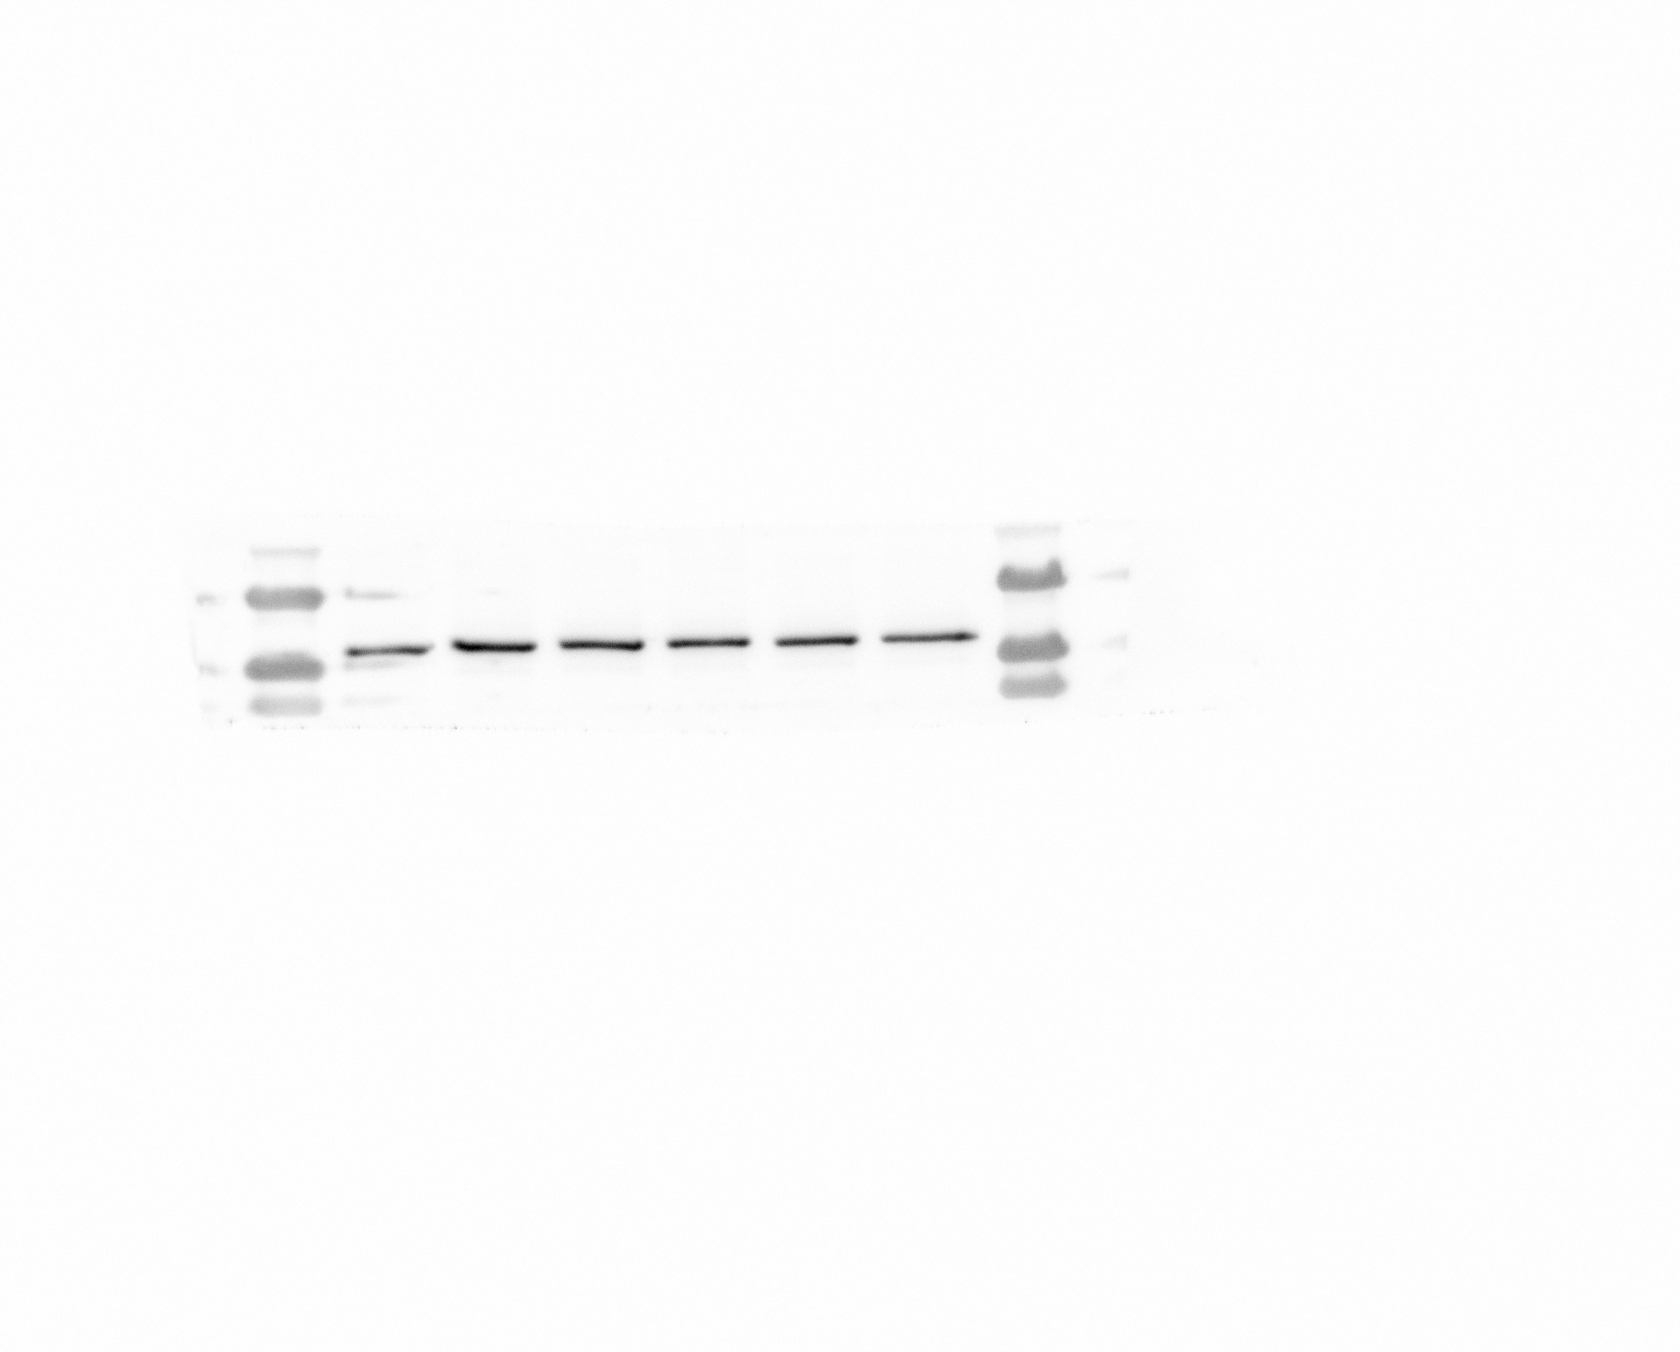


βactin - EMT6 (Fig.1 D)


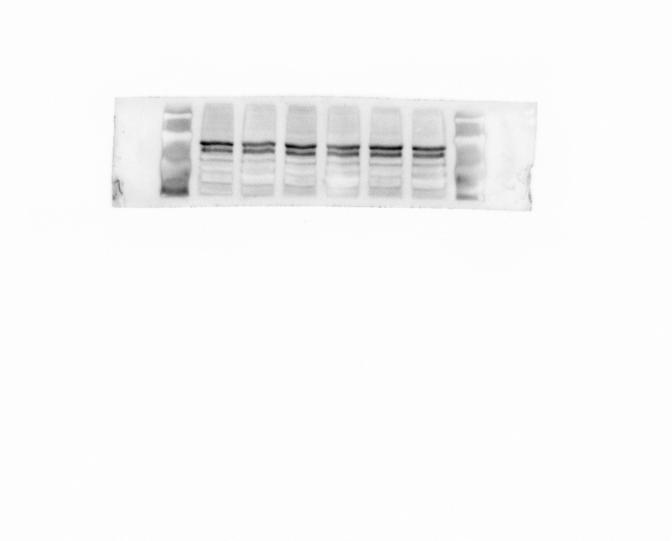


MMP2 - 4T1 (Fig.1 D)


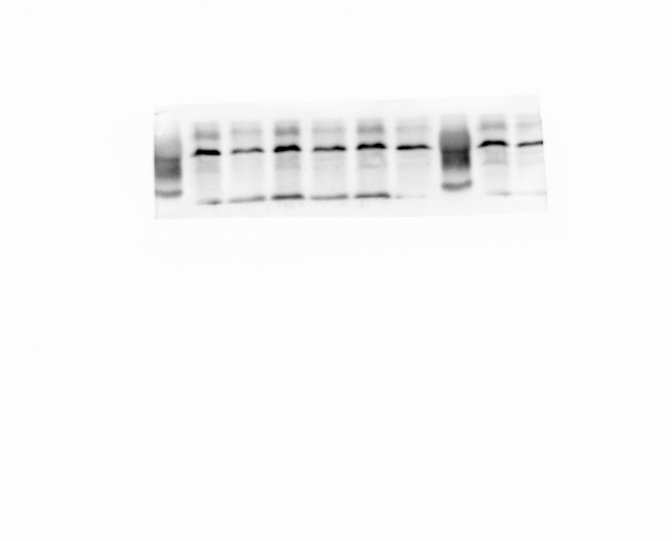


MMP9 - 4T1 (Fig.1 D)


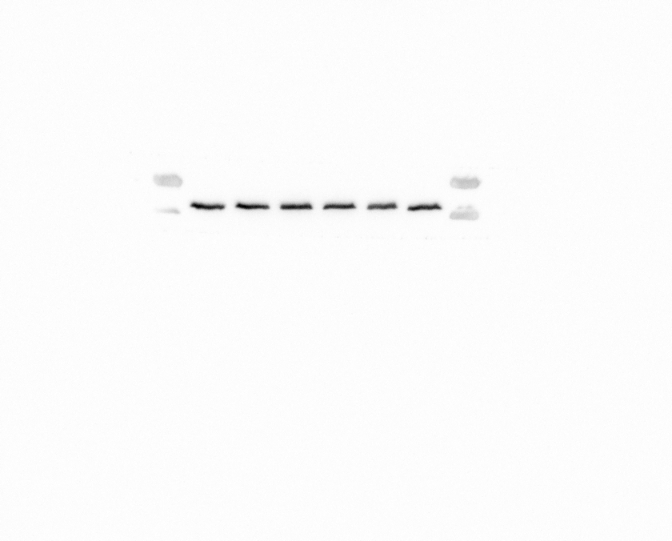


βactin - 4T1 (Fig.1 D)


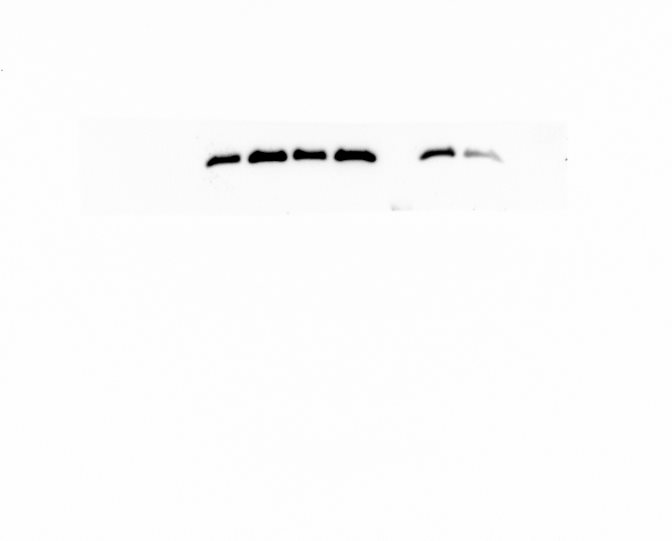


BAX - EMT6 (Fig. 3B)


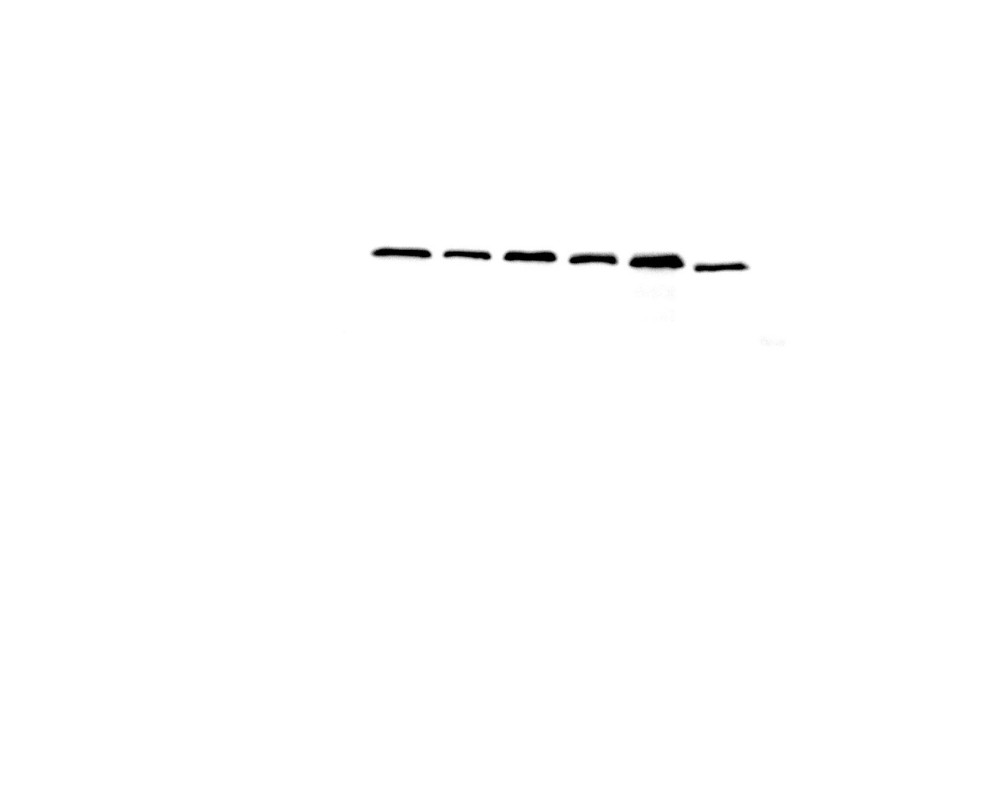


CASPASE 3 - EMT6 (Fig. 3B)


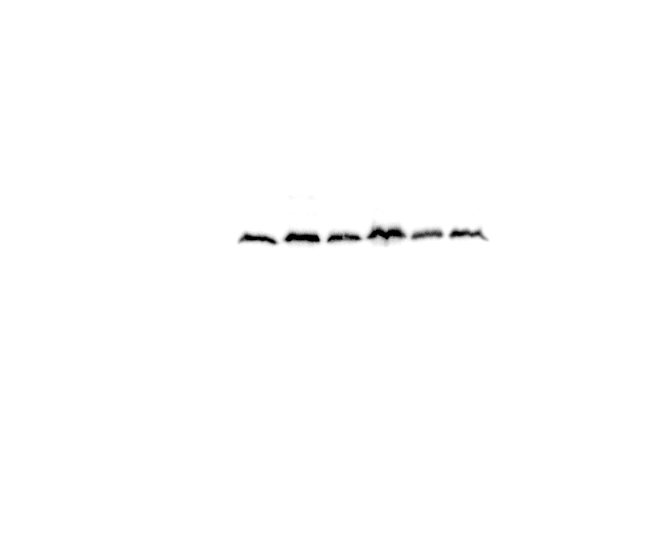


CLEAVED CASPASE3 - EMT6 (Fig. 3B)


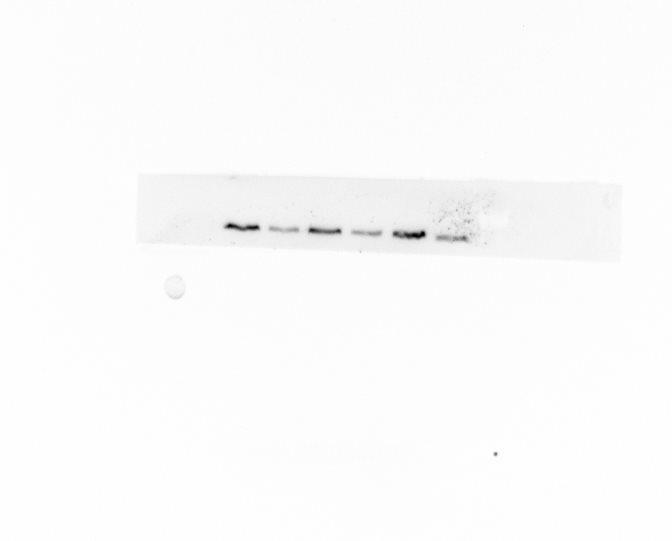


GSDME - EMT6 (Fig. 3B)


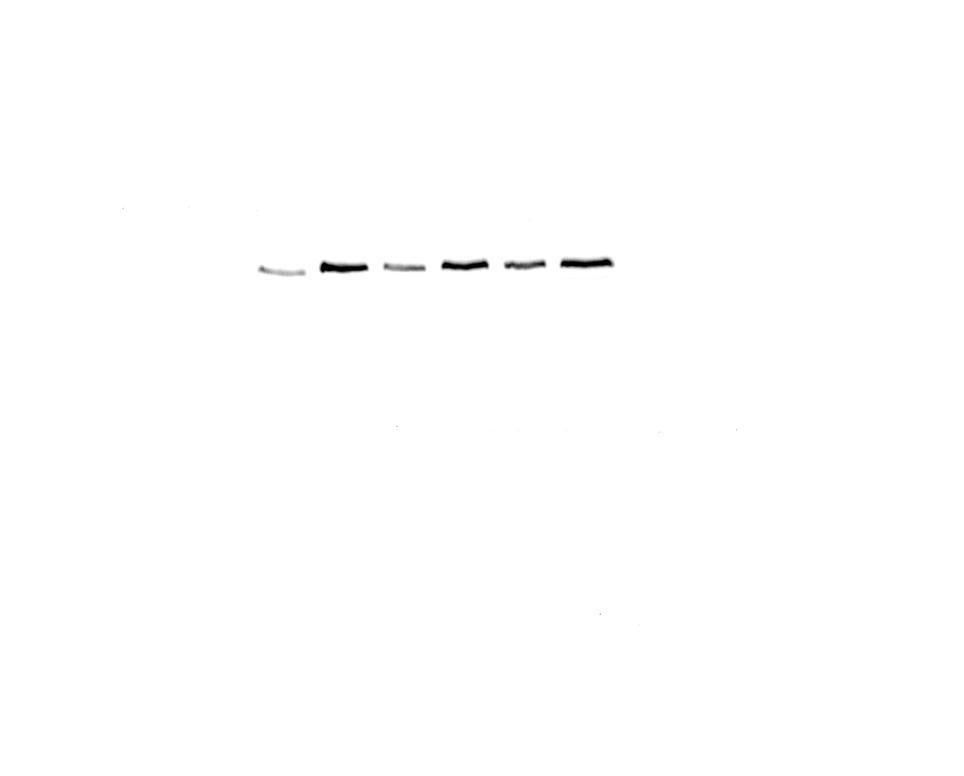


GSDME-N - EMT6 (Fig. 3B)


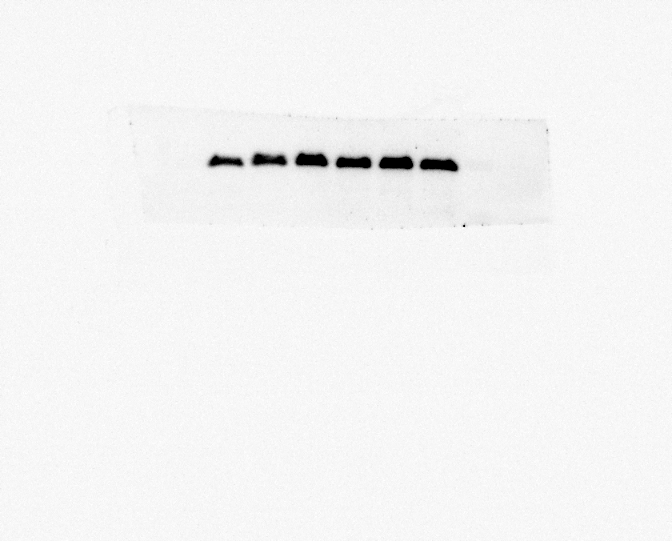


BAX - 4T1 (Fig. 3C)


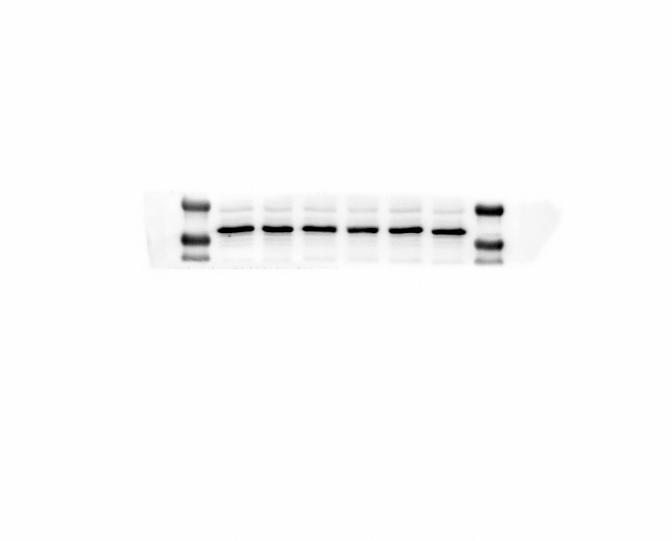


CASPASE 3 - 4T1 (Fig. 3C)


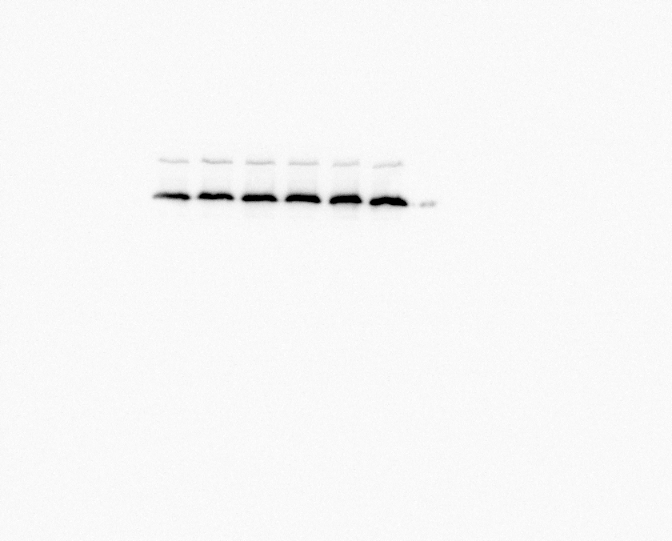


CLEAVED CASPASE3 - 4T1 (Fig. 3C)


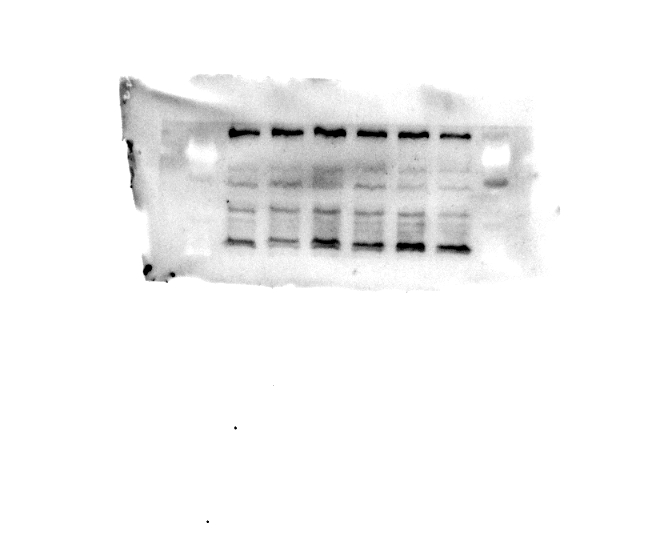


GSDME - 4T1 (Fig. 3C)


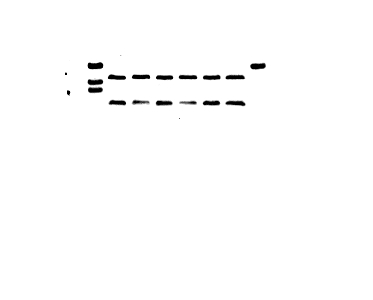


GSDME-N - 4T1 (Fig. 3C)


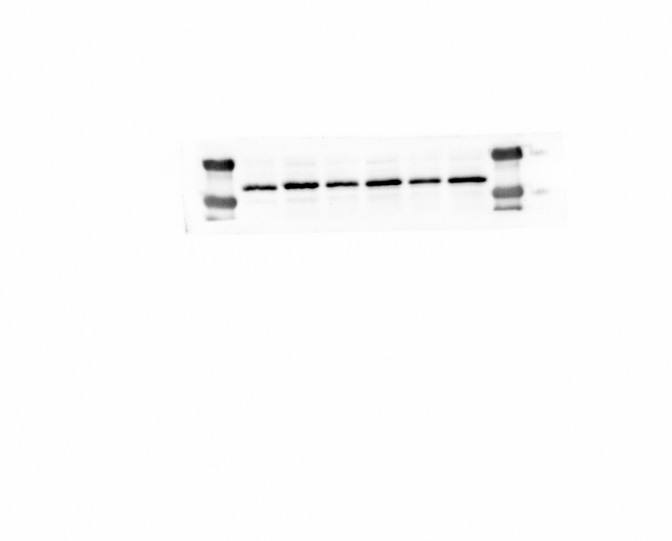


GZMB - 4T1 (Fig. 3C)


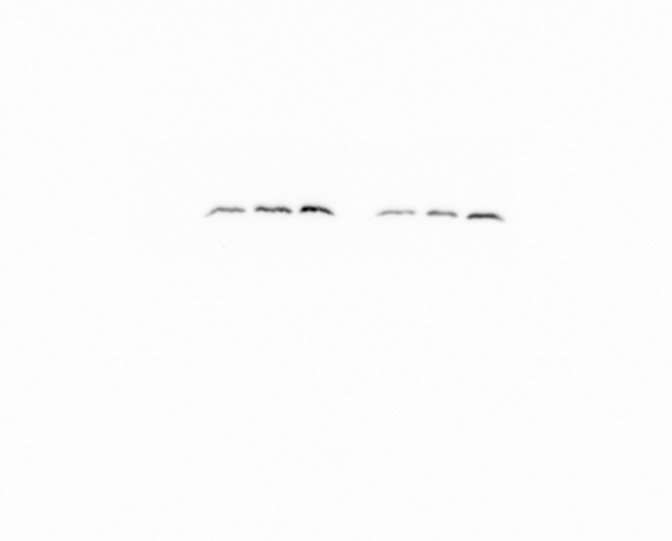


BAX - mouse tumor (Fig. 4K)


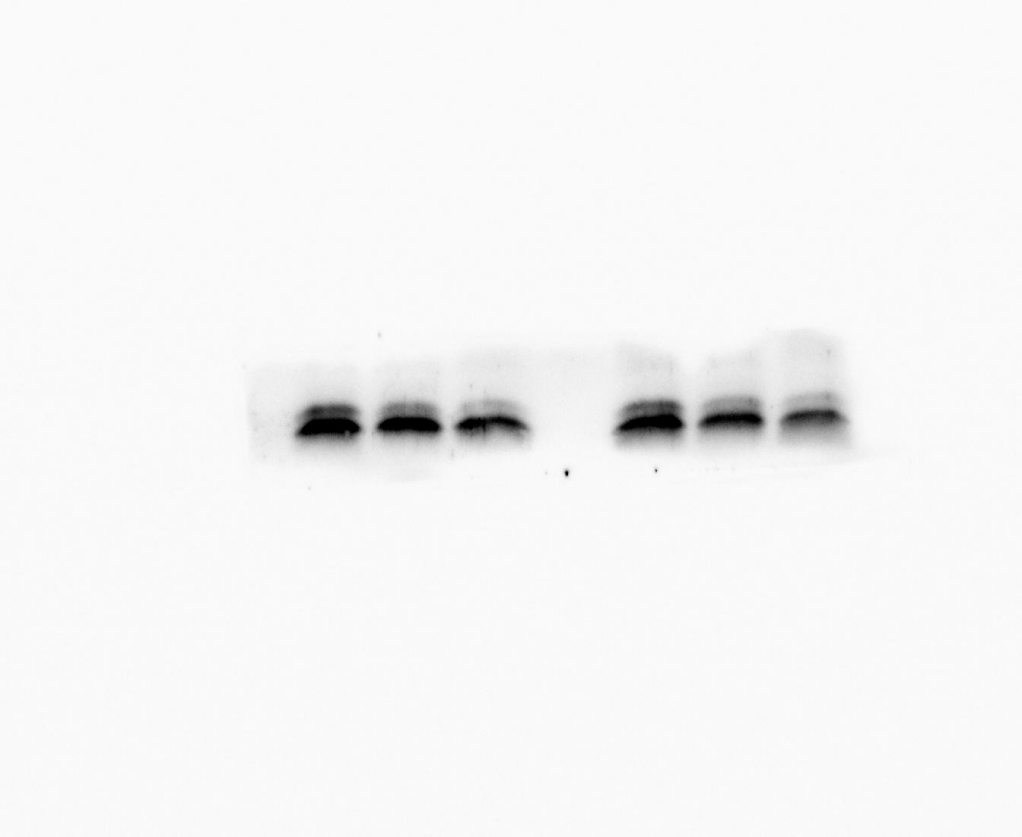


CASPASE-3 - mouse tumor (Fig. 4K)


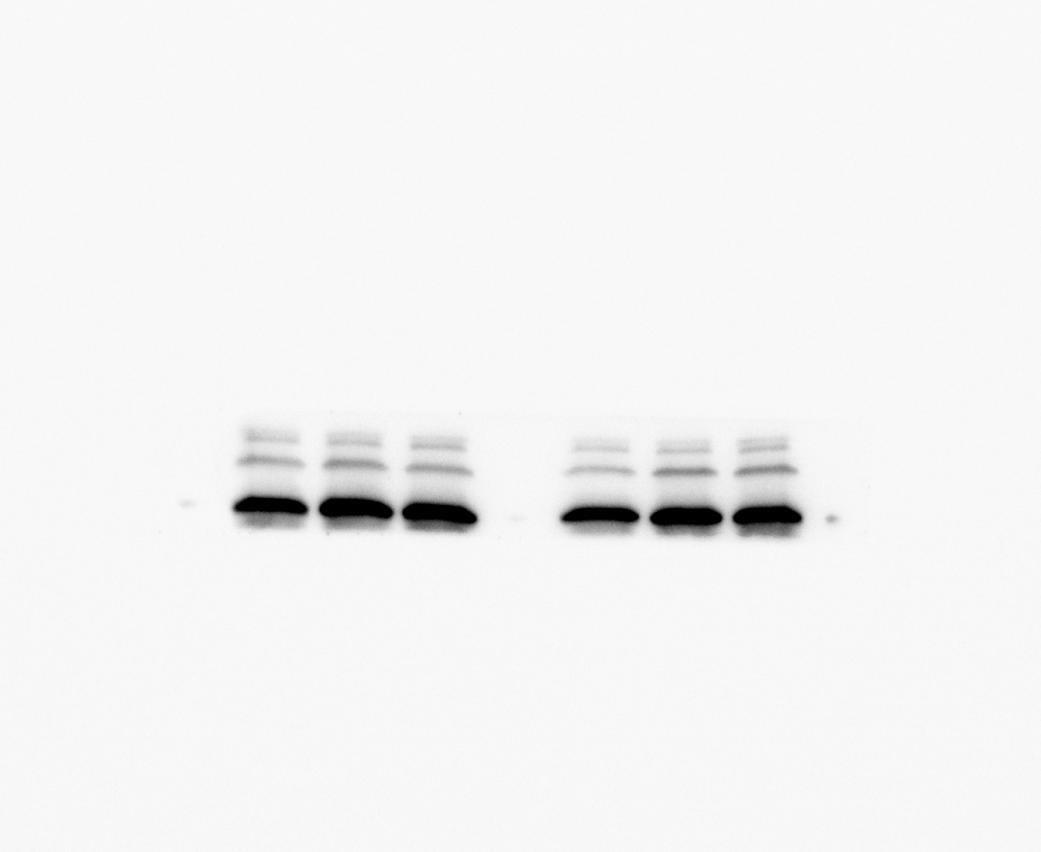


CLEAVED CASPASE-3 - mouse tumor (Fig. 4K)


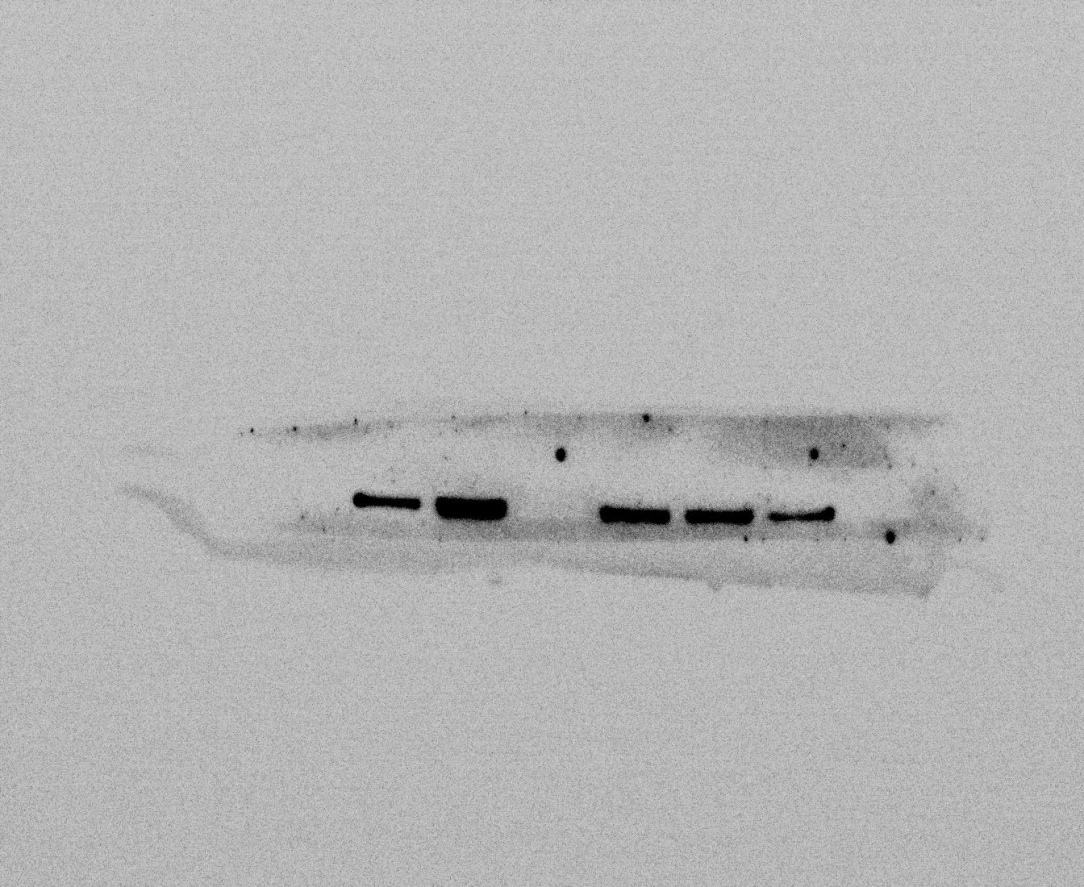


GSDME - mouse tumor (Fig. 4K)


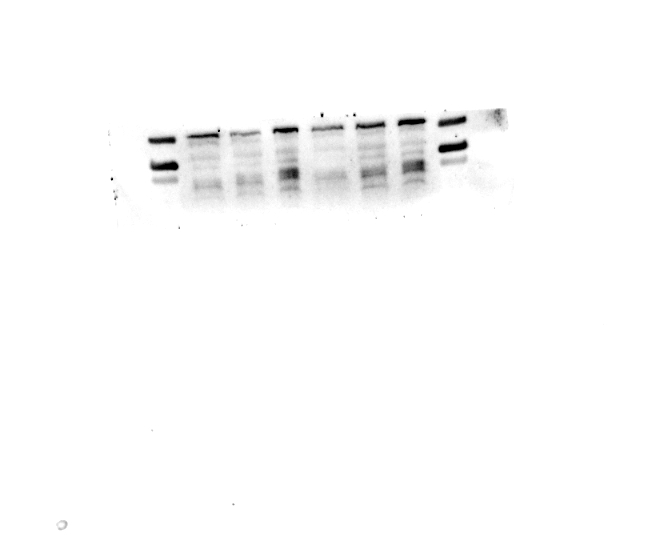


GSDME-N - mouse tumor (Fig. 4K)


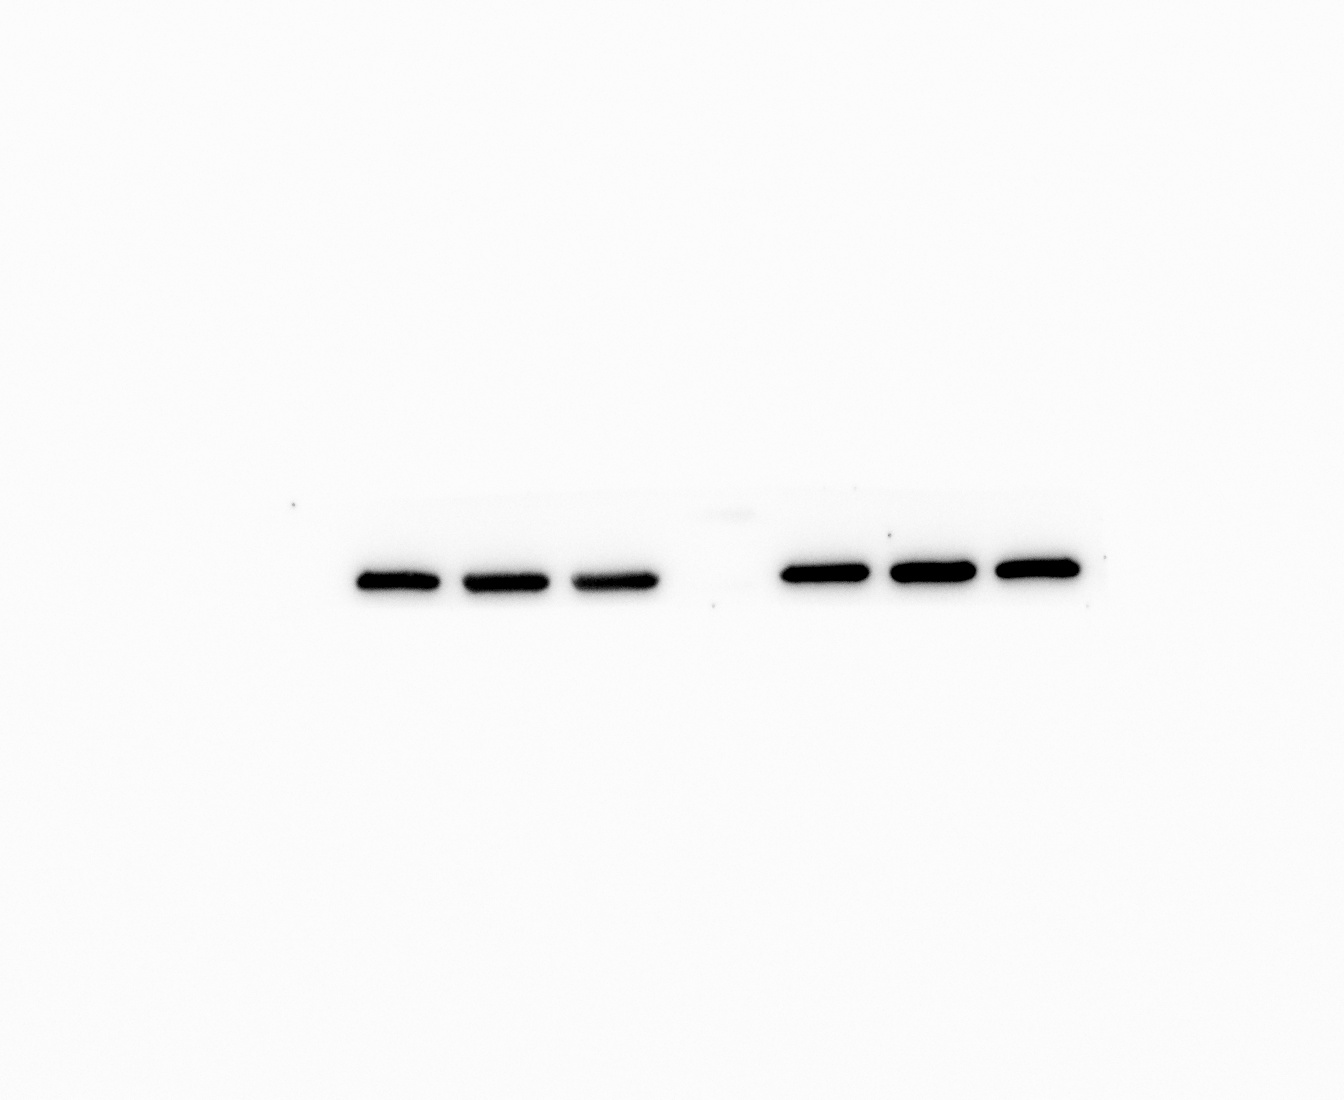


βactin - mouse tumor (Fig. 4K)


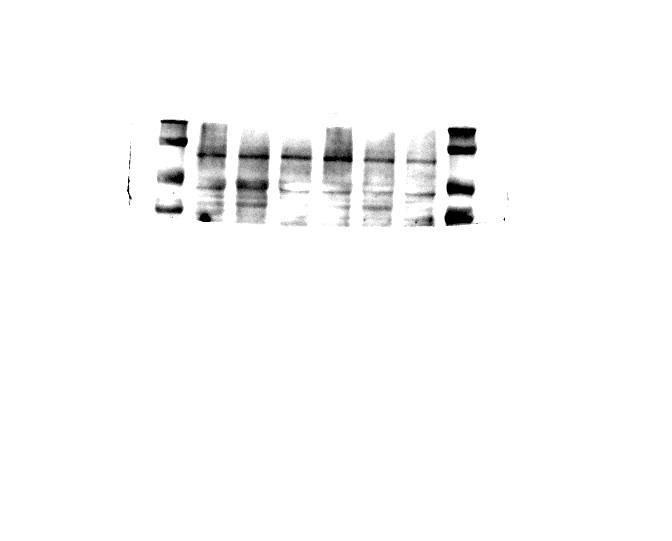


HIF-1α- mouse tumor (Fig. 11S)


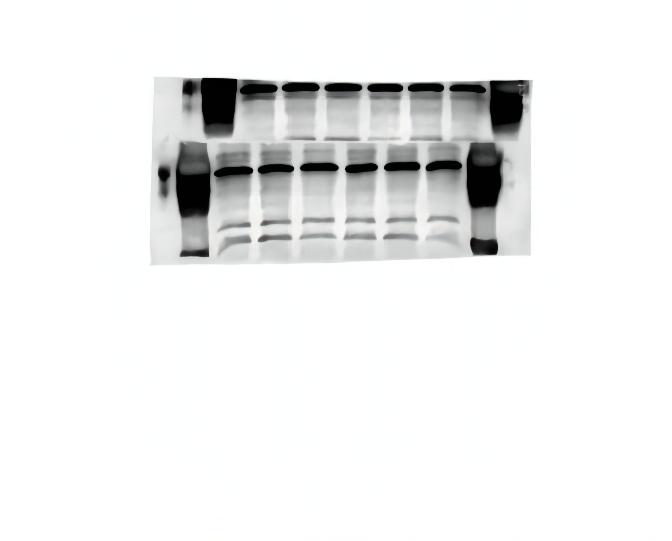


VEGFA - mouse tumor (Fig. 11S)


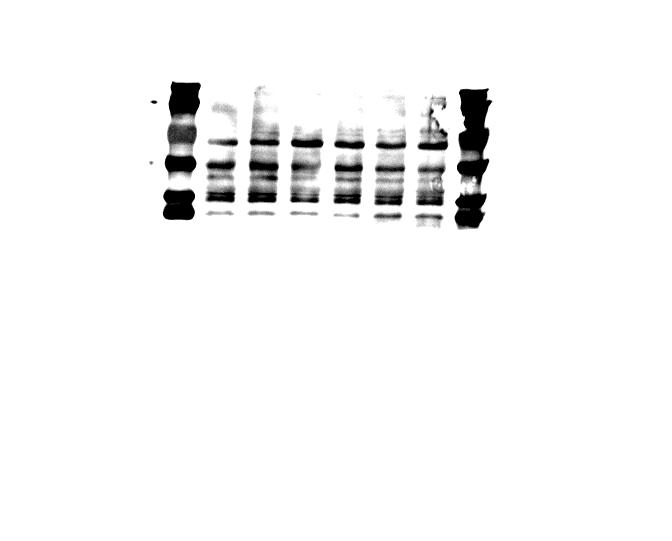


MMP2 - mouse tumor (Fig. 11S)


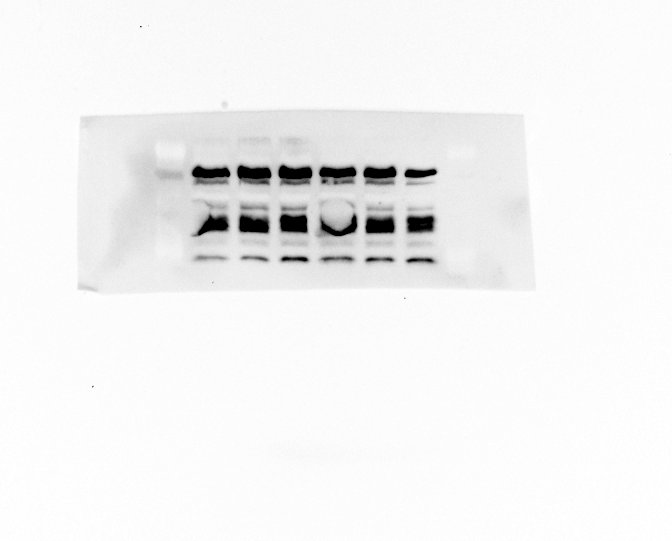


MMP9 - mouse tumor (Fig. 11S)


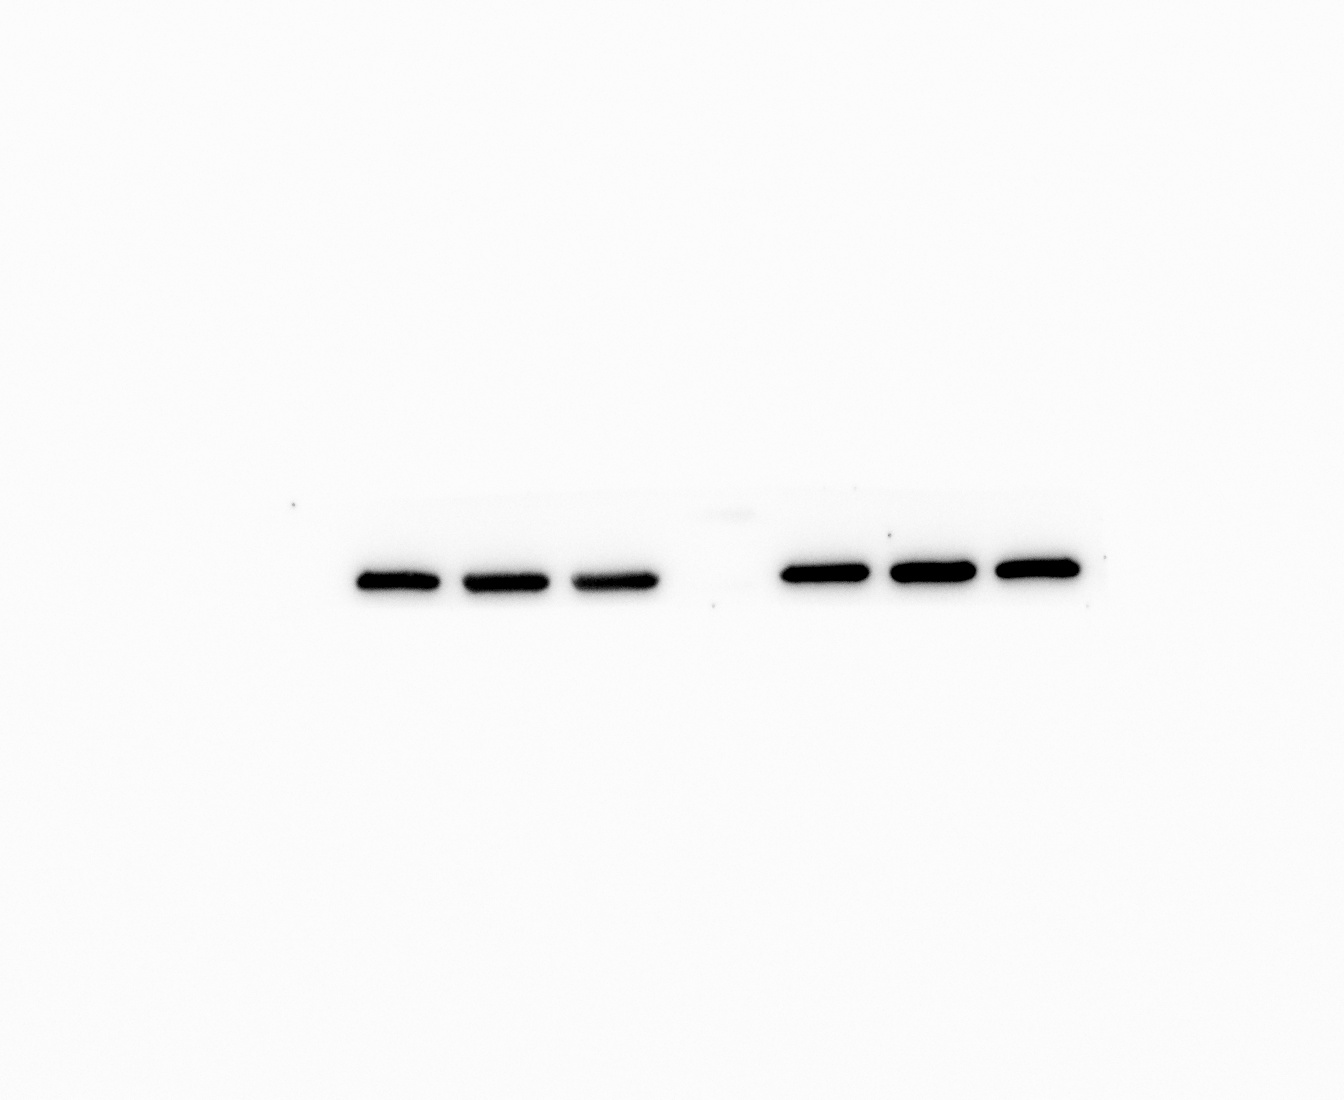


βactin - mouse tumor (Fig. 11S)
